# Supplementary material
Source: PubMed Central journal article supplement (PMC4696056)
Supplement: NIHMS737089-supplement-supplement_1.pdf [file NIHMS737089-supplement-supplement_1.pdf]

## Appendix

SUPPLEMENTARY TABLE 1.

Significant Correlations

| Automated Whole CC    | Eye Movement |          |          | Ambulation |          |          | Speech   |          |          | Swallowing |          |          | Motor    |          |          |
|-----------------------|--------------|----------|----------|------------|----------|----------|----------|----------|----------|------------|----------|----------|----------|----------|----------|
|                       | <i>P</i>     | <i>r</i> | <i>F</i> | <i>P</i>   | <i>r</i> | <i>F</i> | <i>P</i> | <i>r</i> | <i>F</i> | <i>P</i>   | <i>r</i> | <i>F</i> | <i>P</i> | <i>r</i> | <i>F</i> |
| FA                    |              |          |          |            |          |          |          |          |          |            |          |          |          |          |          |
| L genu                | 0.01         | −0.37    | 6.11     | <0.01      | −0.65    | 27.71    | <0.01    | −0.55    | 16.16    | <0.01      | −0.58    | 19.13    | <0.01    | −0.68    | 31.97    |
| L body                | 0.03         | −0.34    | 4.91     | <0.01      | −0.65    | 26.56    | <0.01    | −0.55    | 15.82    | <0.01      | −0.55    | 15.66    | <0.01    | −0.66    | 28.21    |
| L splenium            | 0.04         | −0.32    | 4.16     | <0.01      | −0.57    | 18.21    | <0.01    | −0.45    | 9.57     | <0.01      | −0.51    | 12.73    | <0.01    | −0.6     | 21.07    |
| R genu                | <b>0.39</b>  | −0.14    | 0.74     | <0.01      | −0.59    | 19.52    | <0.01    | −0.38    | 6.19     | <0.01      | −0.49    | 11.7     | <0.01    | −0.53    | 14.31    |
| R body                | 0.01         | −0.4     | 7.13     | <0.01      | −0.71    | 37.39    | <0.01    | −0.59    | 19.37    | <0.01      | −0.6     | 20.7     | <0.01    | −0.71    | 36.84    |
| R splenium            | 0.04         | −0.32    | 4.42     | <0.01      | −0.57    | 18.39    | <0.01    | −0.46    | 9.82     | <0.01      | −0.48    | 11.15    | <0.01    | −0.59    | 20.42    |
| TOTAL                 | 0.03         | −0.33    | 4.55     | <0.01      | −0.67    | 29.67    | <0.01    | −0.53    | 14.16    | <0.01      | −0.57    | 17.81    | <0.01    | −0.67    | 29.75    |
| Volume                |              |          |          |            |          |          |          |          |          |            |          |          |          |          |          |
| L genu                | <b>0.08</b>  | −0.28    | 3.24     | <0.01      | −0.6     | 21.36    | <0.01    | −0.45    | 9.79     | <0.01      | −0.51    | 13.23    | <0.01    | −0.49    | 12.08    |
| L body                | 0.01         | −0.36    | 6.12     | <0.01      | −0.62    | 26.72    | <0.01    | −0.5     | 14.01    | <0.01      | −0.5     | 13.37    | <0.01    | −0.55    | 17.5     |
| L splenium            | <b>0.06</b>  | −0.29    | 3.59     | <0.01      | −0.63    | 26.24    | <0.01    | −0.49    | 12.51    | <0.01      | −0.55    | 17.35    | <0.01    | −0.57    | 18.72    |
| R genu                | <b>0.08</b>  | −0.28    | 3.19     | <0.01      | −0.62    | 23.73    | <0.01    | −0.44    | 8.81     | <0.01      | −0.5     | 12.44    | <0.01    | −0.5     | 12.22    |
| R body                | <0.01        | −0.4     | 7.66     | <0.01      | −0.68    | 37.02    | <0.01    | −0.56    | 18.71    | <0.01      | −0.55    | 17.27    | <0.01    | −0.58    | 21.09    |
| R splenium            | 0.04         | −0.31    | 4.16     | <0.01      | −0.59    | 22.07    | <0.01    | −0.47    | 10.97    | <0.01      | −0.52    | 15.1     | <0.01    | −0.54    | 16.23    |
| TOTAL                 | 0.03         | −0.33    | 4.77     | <0.01      | −0.65    | 28.99    | <0.01    | −0.5     | 13.29    | <0.01      | −0.54    | 16.53    | <0.01    | −0.56    | 17.99    |
| Manual midsagittal    |              |          |          |            |          |          |          |          |          |            |          |          |          |          |          |
| FA midsagittal        | 0.02         | −0.37    | 5.83     | <0.01      | −0.68    | 31.42    | <0.01    | −0.54    | 15.49    | <0.01      | −0.54    | 15.23    | <0.01    | −0.64    | 25.67    |
| Area midsagittal      | <b>0.08</b>  | −0.28    | 3.19     | <0.01      | −0.69    | 33.95    | <0.01    | −0.55    | 16.03    | <0.01      | −0.61    | 21.78    | <0.01    | −0.6     | 21.07    |
| Automated midsagittal |              |          |          |            |          |          |          |          |          |            |          |          |          |          |          |
| FA midsagittal        | <b>0.07</b>  | −0.29    | 3.37     | <0.01      | −0.69    | 34.14    | <0.01    | −0.51    | 12.97    | <0.01      | −0.53    | 14.28    | <0.01    | −0.66    | 28.59    |
| Area midsagittal      | <b>0.23</b>  | −0.18    | 1.45     | <0.01      | −0.55    | 17.84    | <0.01    | −0.37    | 6.65     | <0.01      | −0.42    | 9.08     | <0.01    | −0.39    | 7.17     |

Abbreviations:

L = Left

R = Right

CC = Corpus callosum

FA = Fractional anisotropy

Area mentioned here refers to the cross-sectional area.

Nonsignificant *P* values >0.05 are distinguished by bold values.CoQ10 therapy analyses do not have *r* and *F* values because of Mann-Whitney test used.

**SUPPLEMENTARY TABLE 1.**  
Significant Correlations

| Cognition             |          |          | Memory   |          |          | Seizures |          |          | Narcolepsy  |          |          | Hyperreflexia |          |          | Incontinence |          |          | CoQ10 Therapy |  |
|-----------------------|----------|----------|----------|----------|----------|----------|----------|----------|-------------|----------|----------|---------------|----------|----------|--------------|----------|----------|---------------|--|
| <i>P</i>              | <i>r</i> | <i>F</i> | <i>P</i> | <i>r</i> | <i>F</i> | <i>P</i> | <i>r</i> | <i>F</i> | <i>P</i>    | <i>r</i> | <i>F</i> | <i>P</i>      | <i>r</i> | <i>F</i> | <i>P</i>     | <i>r</i> | <i>F</i> | <i>P</i>      |  |
| FA                    |          |          |          |          |          |          |          |          |             |          |          |               |          |          |              |          |          |               |  |
| <0.01                 | -0.64    | 26.04    | <0.01    | -0.56    | 17.28    | <0.01    | -0.6     | 20.84    | <0.01       | -0.42    | 8.22     | 0.01          | -0.37    | 6.1      | <0.01        | -0.67    | 31.13    | <b>0.60</b>   |  |
| <0.01                 | -0.58    | 18.91    | <0.01    | -0.54    | 15.58    | <0.01    | -0.56    | 19.27    | <0.01       | -0.32    | 4.17     | 0.03          | -0.33    | 4.64     | <0.01        | -0.61    | 22.27    | <b>0.32</b>   |  |
| <0.01                 | -0.5     | 12.17    | <0.01    | -0.5     | 12.2     | <0.01    | -0.4     | 7.27     | <b>0.59</b> | -0.08    | 0.29     | <b>0.25</b>   | -0.19    | 1.36     | <0.01        | -0.56    | 17.19    | <b>0.38</b>   |  |
| <0.01                 | -0.53    | 14.4     | <0.01    | -0.38    | 6.17     | <0.01    | -0.48    | 11.14    | 0.02        | -0.35    | 5.12     | 0.04          | -0.32    | 4.22     | <0.01        | -0.51    | 13.11    | <b>0.69</b>   |  |
| <0.01                 | -0.62    | 23.67    | <0.01    | -0.6     | 20.99    | <0.01    | -0.63    | 24.86    | 0.02        | -0.36    | 5.53     | 0.01          | -0.39    | 6.78     | <0.01        | -0.64    | 26.03    | <b>0.25</b>   |  |
| <0.01                 | -0.5     | 12.8     | <0.01    | -0.49    | 11.97    | <0.01    | -0.43    | 8.32     | <b>0.41</b> | -0.13    | 0.7      | <b>0.20</b>   | -0.21    | 1.7      | <0.01        | -0.56    | 17.42    | <b>0.32</b>   |  |
| <0.01                 | -0.6     | 21.23    | <0.01    | -0.54    | 15.42    | <0.01    | -0.56    | 17.24    | 0.04        | -0.32    | 4.14     | 0.03          | -0.33    | 4.62     | <0.01        | -0.63    | 24.78    | <b>0.66</b>   |  |
| Volume                |          |          |          |          |          |          |          |          |             |          |          |               |          |          |              |          |          |               |  |
| <0.01                 | -0.5     | 12.94    | <0.01    | -0.46    | 10.08    | <0.01    | -0.54    | 15.27    | 0.03        | -0.33    | 4.63     | 0.02          | -0.37    | 5.9      | <0.01        | -0.49    | 11.66    | <b>0.43</b>   |  |
| <0.01                 | -0.53    | 15.81    | <0.01    | -0.51    | 14.84    | <0.01    | -0.53    | 16.29    | <b>0.07</b> | -0.27    | 3.32     | 0.02          | -0.35    | 5.5      | <0.01        | -0.5     | 14.04    | 0.03          |  |
| <0.01                 | -0.48    | 11.79    | <0.01    | -0.46    | 10.34    | <0.01    | -0.48    | 11.77    | <b>0.59</b> | -0.25    | 2.52     | 0.03          | -0.34    | 4.97     | <0.01        | -0.49    | 12.14    | <b>0.08</b>   |  |
| <0.01                 | -0.52    | 14.2     | <0.01    | -0.43    | 8.53     | <0.01    | -0.5     | 12.46    | <b>0.06</b> | -0.3     | 3.64     | 0.03          | -0.34    | 4.98     | <0.01        | -0.47    | 10.86    | <b>0.33</b>   |  |
| <0.01                 | -0.56    | 18.87    | <0.01    | -0.53    | 15.57    | <0.01    | -0.52    | 14.96    | <b>0.13</b> | -0.23    | 2.32     | 0.04          | -0.32    | 4.42     | <0.01        | -0.49    | 12.92    | 0.01          |  |
| <0.01                 | -0.48    | 11.71    | <0.01    | -0.43    | 8.89     | <0.01    | -0.44    | 9.55     | <b>0.16</b> | -0.22    | 2.04     | 0.02          | -0.35    | 5.6      | <0.01        | -0.45    | 10.18    | <b>0.06</b>   |  |
| <0.01                 | -0.53    | 15.23    | <0.01    | -0.48    | 11.95    | <0.01    | -0.51    | 14.14    | <b>0.08</b> | -0.27    | 3.14     | 0.02          | -0.36    | 5.69     | <0.01        | -0.5     | 13.01    | <b>0.19</b>   |  |
| Manual midsagittal    |          |          |          |          |          |          |          |          |             |          |          |               |          |          |              |          |          |               |  |
| <0.01                 | -0.55    | 16       | <0.01    | -0.55    | 15.69    | <0.01    | -0.56    | 16.81    | <b>0.06</b> | -0.3     | 3.7      | <b>0.12</b>   | -0.25    | 2.52     | <0.01        | -0.62    | 23.72    | <b>0.60</b>   |  |
| <0.01                 | -0.51    | 13.36    | <0.01    | -0.54    | 15.54    | <0.01    | -0.55    | 16.33    | <b>0.12</b> | -0.25    | 2.42     | <b>0.10</b>   | -0.27    | 2.84     | <0.01        | -0.48    | 11.39    | <b>0.13</b>   |  |
| Automated midsagittal |          |          |          |          |          |          |          |          |             |          |          |               |          |          |              |          |          |               |  |
| <0.01                 | -0.52    | 14.02    | <0.01    | -0.45    | 9.15     | <0.01    | -0.58    | 18.64    | 0.04        | -0.33    | 4.51     | 0.04          | -0.33    | 4.42     | <0.01        | -0.56    | 16.53    | <b>0.45</b>   |  |
| <0.01                 | -0.39    | 7.6      | <0.01    | -0.39    | 7.49     | <0.01    | -0.43    | 9.2      | <b>0.27</b> | -0.17    | 1.25     | <b>0.16</b>   | -0.22    | 2.04     | 0.01         | -0.39    | 7.23     | <b>0.15</b>   |  |

**SUPPLEMENTARY TABLE 2.**  
Nonsignificant Correlations

| Automated Whole CC    | Eye Movement    |          |          | Ambulation      |          |          | Speech          |          |          | Swallowing      |          |          | Motor           |          |
|-----------------------|-----------------|----------|----------|-----------------|----------|----------|-----------------|----------|----------|-----------------|----------|----------|-----------------|----------|
|                       | <i>P</i>        | <i>r</i> | <i>F</i> | <i>P</i>        | <i>r</i> |
| FA                    |                 |          |          |                 |          |          |                 |          |          |                 |          |          |                 |          |
| L genu                | <b>0.01</b>     | −0.37    | 6.11     | <b>&lt;0.01</b> | −0.65    | 27.71    | <b>&lt;0.01</b> | −0.55    | 16.16    | <b>&lt;0.01</b> | −0.58    | 19.13    | <b>&lt;0.01</b> | −0.68    |
| L body                | <b>0.03</b>     | −0.34    | 4.91     | <b>&lt;0.01</b> | −0.65    | 26.56    | <b>&lt;0.01</b> | −0.55    | 15.82    | <b>&lt;0.01</b> | −0.55    | 15.66    | <b>&lt;0.01</b> | −0.66    |
| L splenium            | <b>0.04</b>     | −0.32    | 4.16     | <b>&lt;0.01</b> | −0.57    | 18.21    | <b>&lt;0.01</b> | −0.45    | 9.57     | <b>&lt;0.01</b> | −0.51    | 12.73    | <b>&lt;0.01</b> | −0.6     |
| R genu                | 0.39            | −0.14    | 0.74     | <b>&lt;0.01</b> | −0.59    | 19.52    | <b>&lt;0.01</b> | −0.38    | 6.19     | <b>&lt;0.01</b> | −0.49    | 11.7     | <b>&lt;0.01</b> | −0.53    |
| R body                | <b>0.01</b>     | −0.4     | 7.13     | <b>&lt;0.01</b> | −0.71    | 37.39    | <b>&lt;0.01</b> | −0.59    | 19.37    | <b>&lt;0.01</b> | −0.6     | 20.7     | <b>&lt;0.01</b> | −0.71    |
| R splenium            | <b>0.04</b>     | −0.32    | 4.42     | <b>&lt;0.01</b> | −0.57    | 18.39    | <b>&lt;0.01</b> | −0.46    | 9.82     | <b>&lt;0.01</b> | −0.48    | 11.15    | <b>&lt;0.01</b> | −0.59    |
| TOTAL                 | <b>0.03</b>     | −0.33    | 4.55     | <b>&lt;0.01</b> | −0.67    | 29.67    | <b>&lt;0.01</b> | −0.53    | 14.16    | <b>&lt;0.01</b> | −0.57    | 17.81    | <b>&lt;0.01</b> | −0.67    |
| Volume                |                 |          |          |                 |          |          |                 |          |          |                 |          |          |                 |          |
| L genu                | 0.08            | −0.28    | 3.24     | <b>&lt;0.01</b> | −0.6     | 21.36    | <b>&lt;0.01</b> | −0.45    | 9.79     | <b>&lt;0.01</b> | −0.51    | 13.23    | <b>&lt;0.01</b> | −0.49    |
| L body                | <b>0.01</b>     | −0.36    | 6.12     | <b>&lt;0.01</b> | −0.62    | 26.72    | <b>&lt;0.01</b> | −0.5     | 14.01    | <b>&lt;0.01</b> | −0.5     | 13.37    | <b>&lt;0.01</b> | −0.55    |
| L splenium            | 0.06            | −0.29    | 3.59     | <b>&lt;0.01</b> | −0.63    | 26.24    | <b>&lt;0.01</b> | −0.49    | 12.51    | <b>&lt;0.01</b> | −0.55    | 17.35    | <b>&lt;0.01</b> | −0.57    |
| R genu                | 0.08            | −0.28    | 3.19     | <b>&lt;0.01</b> | −0.62    | 23.73    | <b>&lt;0.01</b> | −0.44    | 8.81     | <b>&lt;0.01</b> | −0.5     | 12.44    | <b>&lt;0.01</b> | −0.5     |
| R body                | <b>&lt;0.01</b> | −0.4     | 7.66     | <b>&lt;0.01</b> | −0.68    | 37.02    | <b>&lt;0.01</b> | −0.56    | 18.71    | <b>&lt;0.01</b> | −0.55    | 17.27    | <b>&lt;0.01</b> | −0.58    |
| R splenium            | <b>0.04</b>     | −0.31    | 4.16     | <b>&lt;0.01</b> | −0.59    | 22.07    | <b>&lt;0.01</b> | −0.47    | 10.97    | <b>&lt;0.01</b> | −0.52    | 15.1     | <b>&lt;0.01</b> | −0.54    |
| TOTAL                 | <b>0.03</b>     | −0.33    | 4.77     | <b>&lt;0.01</b> | −0.65    | 28.99    | <b>&lt;0.01</b> | −0.5     | 13.29    | <b>&lt;0.01</b> | −0.54    | 16.53    | <b>&lt;0.01</b> | −0.56    |
| Manual midsagittal    |                 |          |          |                 |          |          |                 |          |          |                 |          |          |                 |          |
| FA midsagittal        | <b>0.02</b>     | −0.37    | 5.83     | <b>&lt;0.01</b> | −0.68    | 31.42    | <b>&lt;0.01</b> | −0.54    | 15.49    | <b>&lt;0.01</b> | −0.54    | 15.23    | <b>&lt;0.01</b> | −0.64    |
| Area midsagittal      | 0.08            | −0.28    | 3.19     | <b>&lt;0.01</b> | −0.69    | 33.95    | <b>&lt;0.01</b> | −0.55    | 16.03    | <b>&lt;0.01</b> | −0.61    | 21.78    | <b>&lt;0.01</b> | −0.6     |
| Automated midsagittal |                 |          |          |                 |          |          |                 |          |          |                 |          |          |                 |          |
| FA midsagittal        | 0.07            | −0.29    | 3.37     | <b>&lt;0.01</b> | −0.69    | 34.14    | <b>&lt;0.01</b> | −0.51    | 12.97    | <b>&lt;0.01</b> | −0.53    | 14.28    | <b>&lt;0.01</b> | −0.66    |
| Area midsagittal      | 0.23            | −0.18    | 1.45     | <b>&lt;0.01</b> | −0.55    | 17.84    | <b>&lt;0.01</b> | −0.37    | 6.65     | <b>&lt;0.01</b> | −0.42    | 9.08     | <b>&lt;0.01</b> | −0.39    |

Abbreviations:

L = Left

R = Right

CC = Corpus callosum

FA = Fractional anisotropy

Area mentioned here refers to the cross-sectional area.

Significant *P* values <0.05 are distinguished by bold values.

CoQ10 therapy analyses do not have *r* and *F* values because of Mann-Whitney test used.

## SUPPLEMENTARY TABLE 2.

## Nonsignificant Correlations

| Motor<br>F            | Cognition |       |       | Memory |       |       | Seizures |       |       | Narcolepsy |       |      | Hyperreflexia |       |      | Incontinence |       |       | CoQ10 Therapy<br>P |
|-----------------------|-----------|-------|-------|--------|-------|-------|----------|-------|-------|------------|-------|------|---------------|-------|------|--------------|-------|-------|--------------------|
|                       | P         | r     | F     | P      | r     | F     | P        | r     | F     | P          | r     | F    | P             | r     | F    | P            | r     | F     |                    |
| FA                    |           |       |       |        |       |       |          |       |       |            |       |      |               |       |      |              |       |       |                    |
| 31.97                 | <0.01     | -0.64 | 26.04 | <0.01  | -0.56 | 17.28 | <0.01    | -0.6  | 20.84 | <0.01      | -0.42 | 8.22 | 0.01          | -0.37 | 6.1  | <0.01        | -0.67 | 31.13 | 0.60               |
| 28.21                 | <0.01     | -0.58 | 18.91 | <0.01  | -0.54 | 15.58 | <0.01    | -0.56 | 19.27 | <0.01      | -0.32 | 4.17 | 0.03          | -0.33 | 4.64 | <0.01        | -0.61 | 22.27 | 0.32               |
| 21.07                 | <0.01     | -0.5  | 12.17 | <0.01  | -0.5  | 12.2  | <0.01    | -0.4  | 7.27  | 0.59       | -0.08 | 0.29 | 0.25          | -0.19 | 1.36 | <0.01        | -0.56 | 17.19 | 0.38               |
| 14.31                 | <0.01     | -0.53 | 14.4  | <0.01  | -0.38 | 6.17  | <0.01    | -0.48 | 11.14 | 0.02       | -0.35 | 5.12 | 0.04          | -0.32 | 4.22 | <0.01        | -0.51 | 13.11 | 0.69               |
| 36.84                 | <0.01     | -0.62 | 23.67 | <0.01  | -0.6  | 20.99 | <0.01    | -0.63 | 24.86 | 0.02       | -0.36 | 5.53 | 0.01          | -0.39 | 6.78 | <0.01        | -0.64 | 26.03 | 0.25               |
| 20.42                 | <0.01     | -0.5  | 12.8  | <0.01  | -0.49 | 11.97 | <0.01    | -0.43 | 8.32  | 0.41       | -0.13 | 0.7  | 0.20          | -0.21 | 1.7  | <0.01        | -0.56 | 17.42 | 0.32               |
| 29.75                 | <0.01     | -0.6  | 21.23 | <0.01  | -0.54 | 15.42 | <0.01    | -0.56 | 17.24 | 0.04       | -0.32 | 4.14 | 0.03          | -0.33 | 4.62 | <0.01        | -0.63 | 24.78 | 0.66               |
| Volume                |           |       |       |        |       |       |          |       |       |            |       |      |               |       |      |              |       |       |                    |
| 12.08                 | <0.01     | -0.5  | 12.94 | <0.01  | -0.46 | 10.08 | <0.01    | -0.54 | 15.27 | 0.03       | -0.33 | 4.63 | 0.02          | -0.37 | 5.9  | <0.01        | -0.49 | 11.66 | 0.430              |
| 17.5                  | <0.01     | -0.53 | 15.81 | <0.01  | -0.51 | 14.84 | <0.01    | -0.53 | 16.29 | 0.07       | -0.27 | 3.32 | 0.02          | -0.35 | 5.5  | <0.01        | -0.5  | 14.04 | 0.03               |
| 18.72                 | <0.01     | -0.48 | 11.79 | <0.01  | -0.46 | 10.34 | <0.01    | -0.48 | 11.77 | 0.59       | -0.25 | 2.52 | 0.03          | -0.34 | 4.97 | <0.01        | -0.49 | 12.14 | 0.08               |
| 12.22                 | <0.01     | -0.52 | 14.2  | <0.01  | -0.43 | 8.53  | <0.01    | -0.5  | 12.46 | 0.06       | -0.3  | 3.64 | 0.03          | -0.34 | 4.98 | <0.01        | -0.47 | 10.86 | 0.33               |
| 21.09                 | <0.01     | -0.56 | 18.87 | <0.01  | -0.53 | 15.57 | <0.01    | -0.52 | 14.96 | 0.13       | -0.23 | 2.32 | 0.04          | -0.32 | 4.42 | <0.01        | -0.49 | 12.92 | 0.01               |
| 16.23                 | <0.01     | -0.48 | 11.71 | <0.01  | -0.43 | 8.89  | <0.01    | -0.44 | 9.55  | 0.16       | -0.22 | 2.04 | 0.02          | -0.35 | 5.6  | <0.01        | -0.45 | 10.18 | 0.06               |
| 17.99                 | <0.01     | -0.53 | 15.23 | <0.01  | -0.48 | 11.95 | <0.01    | -0.51 | 14.14 | 0.08       | -0.27 | 3.14 | 0.02          | -0.36 | 5.69 | <0.01        | -0.5  | 13.01 | 0.19               |
| Manual midsagittal    |           |       |       |        |       |       |          |       |       |            |       |      |               |       |      |              |       |       |                    |
| 25.67                 | <0.01     | -0.55 | 16    | <0.01  | -0.55 | 15.69 | <0.01    | -0.56 | 16.81 | 0.06       | -0.3  | 3.7  | 0.12          | -0.25 | 2.52 | <0.01        | -0.62 | 23.72 | 0.60               |
| 21.07                 | <0.01     | -0.51 | 13.36 | <0.01  | -0.54 | 15.54 | <0.01    | -0.55 | 16.33 | 0.12       | -0.25 | 2.42 | 0.10          | -0.27 | 2.84 | <0.01        | -0.48 | 11.39 | 0.13               |
| Automated midsagittal |           |       |       |        |       |       |          |       |       |            |       |      |               |       |      |              |       |       |                    |
| 28.59                 | <0.01     | -0.52 | 14.02 | <0.01  | -0.45 | 9.15  | <0.01    | -0.58 | 18.64 | 0.04       | -0.33 | 4.51 | 0.04          | -0.33 | 4.42 | <0.01        | -0.56 | 16.53 | 0.45               |
| 7.17                  | <0.01     | -0.39 | 7.6   | <0.01  | -0.39 | 7.49  | <0.01    | -0.43 | 9.2   | 0.27       | -0.17 | 1.25 | 0.16          | -0.22 | 2.04 | 0.01         | -0.39 | 7.23  | 0.15               |

**SUPPLEMENTARY TABLE 3.**  
Nonsignificant Correlations

| Automated Whole CC    | Hearing |       |        | Cataplexy |       |      | Behavior |      |      | Psych |       |      | ABR  |       |        | Age at First Symptoms |      |      | Duration of Neuro Symptoms |       |      | Miglustat Therapy |  |
|-----------------------|---------|-------|--------|-----------|-------|------|----------|------|------|-------|-------|------|------|-------|--------|-----------------------|------|------|----------------------------|-------|------|-------------------|--|
|                       | P       | r     | F      | P         | r     | F    | P        | r    | F    | P     | r     | F    | P    | r     | F      | P                     | r    | F    | P                          | r     | F    | P                 |  |
| FA                    |         |       |        |           |       |      |          |      |      |       |       |      |      |       |        |                       |      |      |                            |       |      |                   |  |
| L genu                | 0.32    | 0.16  | 0.98   | 0.09      | -0.27 | 2.99 | 0.86     | 0.02 | 0.03 | 0.29  | -0.17 | 1.13 | 0.97 | 0.005 | 0.0009 | 0.3                   | 0.18 | 1.09 | 0.3                        | -0.18 | 1.08 | 0.57              |  |
| L body                | 0.6     | 0.08  | 0.27   | 0.14      | -0.23 | 2.17 | 0.88     | 0.02 | 0.02 | 0.42  | -0.13 | 0.65 | 0.69 | -0.06 | 0.15   | 0.27                  | 0.19 | 1.23 | 0.27                       | -0.19 | 1.21 | 0.92              |  |
| L splenium            | 0.62    | 0.08  | 0.24   | 0.5       | -0.11 | 0.45 | 0.7      | 0.06 | 0.14 | 0.2   | -0.2  | 1.65 | 0.95 | 0.01  | 0.003  | 0.11                  | 0.28 | 2.69 | 0.11                       | -0.28 | 2.7  | 0.37              |  |
| R genu                | 0.63    | 0.07  | 0.22   | 0.23      | -0.19 | 1.47 | 0.78     | 0.04 | 0.07 | 0.25  | -0.19 | 1.35 | 0.52 | 0.1   | 0.41   | 0.33                  | 0.17 | 0.97 | 0.33                       | -0.17 | 0.97 | 0.98              |  |
| R body                | 0.7     | 0.06  | 0.14   | 0.09      | -0.27 | 2.87 | 0.83     | 0.03 | 0.04 | 0.32  | -0.16 | 0.98 | 0.84 | -0.03 | 0.04   | 0.21                  | 0.22 | 1.63 | 0.21                       | -0.22 | 1.6  | 0.91              |  |
| R splenium            | 0.5     | 0.11  | 0.45   | 0.3       | -0.16 | 1.06 | 0.58     | 0.09 | 0.3  | 0.31  | -0.16 | 1.01 | 0.94 | 0.01  | 0.004  | 0.13                  | 0.26 | 2.31 | 0.13                       | -0.26 | 2.3  | 0.54              |  |
| TOTAL                 | 0.53    | 0.1   | 0.39   | 0.16      | -0.23 | 2.04 | 0.77     | 0.04 | 0.08 | 0.27  | -0.18 | 1.24 | 0.95 | 0.009 | 0.003  | 0.2                   | 0.22 | 1.65 | 0.21                       | -0.22 | 1.63 | 0.67              |  |
| Volume                |         |       |        |           |       |      |          |      |      |       |       |      |      |       |        |                       |      |      |                            |       |      |                   |  |
| L genu                | 0.17    | 0.22  | 1.88   | 0.43      | -0.13 | 0.63 | 0.54     | 0.1  | 0.37 | 0.31  | -0.16 | 1.05 | 0.69 | 0.06  | 0.15   | 0.85                  | 0.03 | 0.03 | 0.85                       | -0.03 | 0.03 | 1.00              |  |
| L body                | 0.68    | 0.06  | 0.16   | 0.2       | -0.2  | 1.69 | 0.56     | 0.06 | 0.34 | 0.27  | -0.17 | 1.2  | 0.89 | -0.02 | 0.01   | 0.54                  | 0.1  | 0.37 | 0.55                       | -0.1  | 0.35 | 0.55              |  |
| L splenium            | 0.47    | 0.11  | 0.53   | 0.46      | -0.11 | 0.54 | 0.3      | 0.16 | 1.06 | 0.28  | -0.17 | 1.15 | 0.47 | 0.11  | 0.52   | 0.25                  | 0.2  | 1.33 | 0.25                       | -0.2  | 1.32 | 0.84              |  |
| R genu                | 0.37    | 0.14  | 0.82   | 0.33      | -0.15 | 0.94 | 0.69     | 0.06 | 0.15 | 0.28  | -0.17 | 1.18 | 0.36 | 0.14  | 0.83   | 0.58                  | 0.09 | 0.3  | 0.59                       | -0.09 | 0.29 | 0.83              |  |
| R body                | 0.8     | -0.03 | 0.05   | 0.24      | -0.18 | 1.37 | 0.57     | 0.09 | 0.31 | 0.3   | -0.16 | 1.07 | 0.89 | -0.02 | 0.01   | 0.35                  | 0.16 | 0.88 | 0.36                       | -0.16 | 0.85 | 0.61              |  |
| R splenium            | 0.43    | 0.12  | 0.61   | 0.53      | -0.1  | 0.4  | 0.28     | 0.17 | 1.19 | 0.34  | -0.15 | 0.92 | 0.45 | 0.12  | 0.55   | 0.31                  | 0.17 | 1.04 | 0.31                       | -0.17 | 1.03 | 0.80              |  |
| TOTAL                 | 0.49    | 0.11  | 0.48   | 0.35      | -0.15 | 0.87 | 0.43     | 0.12 | 0.61 | 0.28  | -0.17 | 1.17 | 0.62 | 0.07  | 0.23   | 0.42                  | 0.14 | 0.65 | 0.42                       | -0.14 | 0.64 | 0.89              |  |
| Manual midsagittal    |         |       |        |           |       |      |          |      |      |       |       |      |      |       |        |                       |      |      |                            |       |      |                   |  |
| FA midsagittal        | 0.36    | 0.15  | 0.83   | 0.19      | -0.21 | 1.74 | 0.65     | 0.07 | 0.2  | 0.29  | -0.17 | 1.13 | 0.75 | -0.05 | 0.09   | 0.24                  | 0.21 | 1.38 | 0.24                       | -0.2  | 1.37 | 0.91              |  |
| Area midsagittal      | 0.98    | -0.01 | 0.0005 | 0.34      | -0.15 | 0.89 | 0.79     | 0.04 | 0.06 | 0.25  | -0.18 | 1.33 | 0.83 | -0.03 | 0.04   | 0.16                  | 0.25 | 2.02 | 0.16                       | -0.24 | 1.98 | 0.81              |  |
| Automated midsagittal |         |       |        |           |       |      |          |      |      |       |       |      |      |       |        |                       |      |      |                            |       |      |                   |  |
| FA midsagittal        | 0.86    | -0.02 | 0.02   | 0.08      | -0.28 | 3.18 | 0.83     | 0.03 | 0.04 | 0.34  | -0.15 | 0.91 | 0.61 | 0.08  | 0.25   | 0.22                  | 0.22 | 1.55 | 0.22                       | -0.21 | 1.52 | 0.78              |  |
| Area midsagittal      | 0.28    | 0.16  | 1.15   | 0.66      | -0.06 | 0.19 | 0.44     | 0.12 | 0.59 | 0.26  | -0.17 | 1.27 | 0.7  | 0.06  | 0.14   | 0.76                  | 0.05 | 0.08 | 0.77                       | -0.05 | 0.08 | 0.84              |  |

Abbreviations:

ABR = Auditory brainstem response

L = Left

R = Right

CC = Corpus callosum

FA = Fractional anisotropy

Area mentioned here refers to the cross-sectional area.

Miglustat therapy analyses do not have *r* and *F* values because of Mann-Whitney test used.
